# Supplementary material
Source: publisher figshare collection journal article supplement (https://acs.figshare.com/ndownloader/files/4032919)
Supplement: Supplementary file 1 [file 4032919]

## Supporting Information

# Water-wettable polypropylene fibers by facile surface treatment based on soy proteins

*Carlos Salas,<sup>†,&</sup> Jan Genzer,<sup>‡</sup> Lucian A. Lucia,<sup>†</sup> Martin A. Hubbe,<sup>†</sup> Orlando J. Rojas,<sup>†,‡,\$,\*</sup>*

<sup>†</sup> Department of Forest Biomaterials, North Carolina State University, Raleigh, NC 27695, USA.

<sup>&</sup> Department of Chemical Engineering, Universidad de Los Andes, Mérida 5101, Venezuela

<sup>‡</sup> Department of Chemical and Biomolecular Engineering, North Carolina State University, Raleigh, NC 27695, USA.

<sup>\$</sup> School of Chemical Technology, Department of Forest Products Technology, Aalto University, 00076 Aalto, Finland

(\*) Corresponding author: Orlando J. Rojas (Email: [ojrojas@ncsu.edu](mailto:ojrojas@ncsu.edu)), Tel. +1-919-5137494

### Johannsmann model to calculate the adsorbed mass

In the Johannsmann model, the shift in QCM frequency ( $\Delta f$ ) is related to the complex shear compliance of the thin film ( $\hat{J}(\omega)$ ) by Eq. 1:<sup>1</sup>

$$\Delta \hat{f} \approx f_o \frac{1}{\pi Z_q} (\omega \rho d + \hat{J}(\omega) \frac{\omega^3 \rho^2 d^3}{3}) \quad (1)$$

where  $Z_q = \sqrt{\rho_q \mu_q} = 8.8 * 10^{-6} kg * m^{-2} s^{-1}$  is the bulk acoustic impedance of crystalline AT-cut quartz,  $\omega = 2\pi f$  and  $f$  is the resonance frequency of the crystal;  $\rho$  is the density of the fluid;  $\rho_q$  is the specific density of the quartz,  $\mu_q$  is the elastic shear modulus of quartz and  $d$  is the thickness of the film.

Equation A can be rearranged by using the equivalent mass  $m^*$  (Eq. 2), which can be used to calculate the true adsorbed mass under the assumption that  $\hat{J}(\omega)$  is independent of  $\omega^2$  resulting in equation 3:

$$m^* = -\frac{Z_q}{2f_o} \frac{\Delta f}{f} \quad (2)$$

$$m^* = m^o \left(1 + \hat{J}(\omega) \frac{\omega^2 \rho d^2}{3}\right) \Rightarrow m^* = m^o \left(1 + \hat{J}(\omega) \frac{f^2 \rho d^2}{3}\right) \quad (3)$$

From equation 3 the true mass can be calculated from a plot of  $m^*$  against  $f^2$  to give  $m^o$  as the intercept.

## Contact angle images of nonwoven surfaces

Neat PP

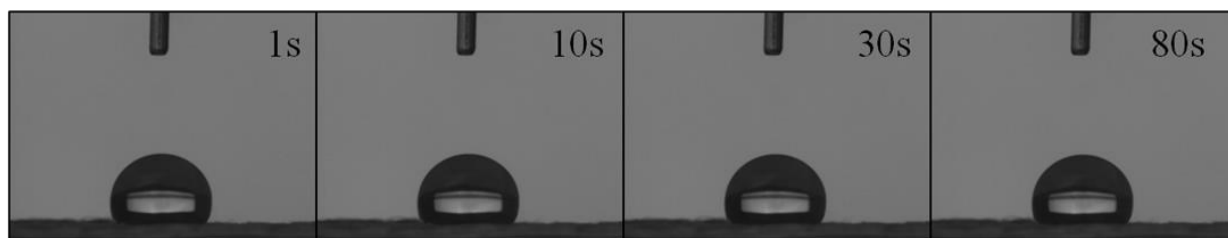

PP after DODA adsorption

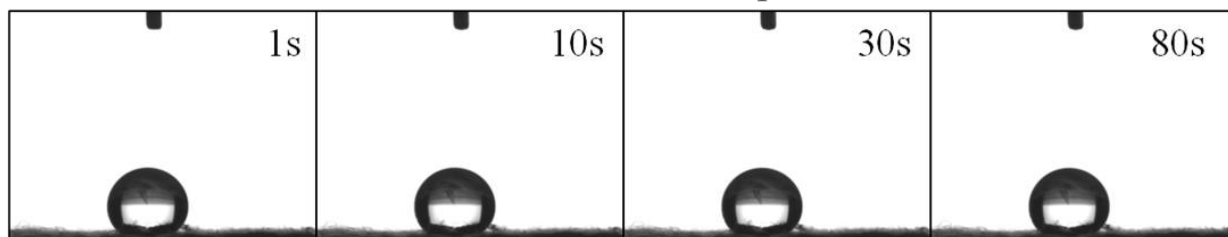

DODA-preadsorbed PP after adsorption of 11S Native

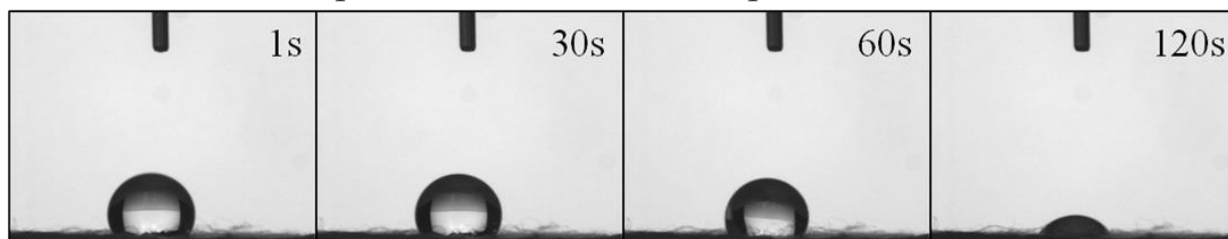

DODA-preadsorbed PP after adsorption of 11S denatured

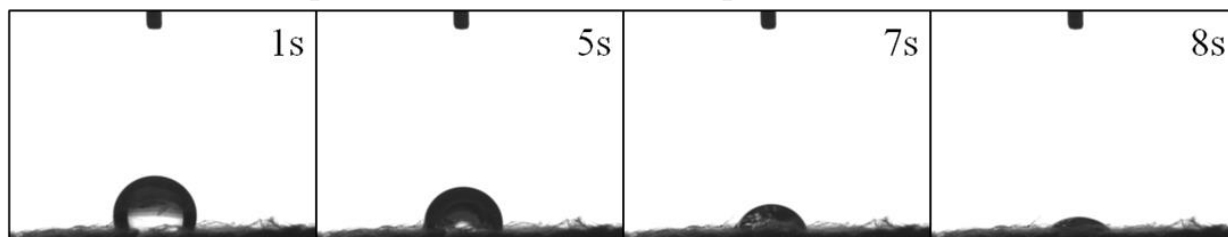

DODA-preadsorbed PP after adsorption of 7S Native

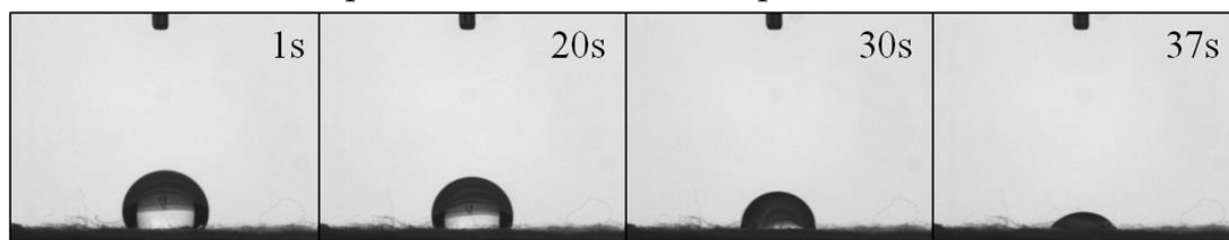

DODA-preadsorbed PP after adsorption of 7S Denatured

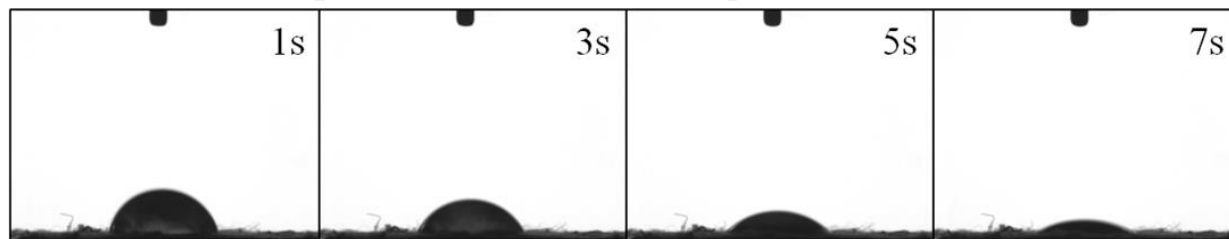

DODA-preadsorbed PP after adsorption of Isolate Native

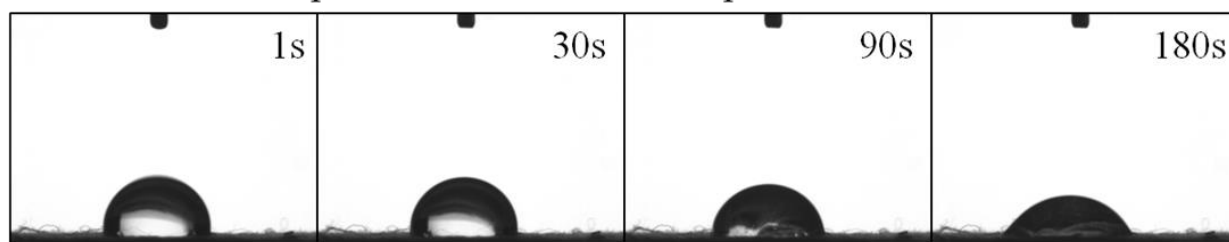

DODA-preadsorbed PP after adsorption of Isolate Denatured

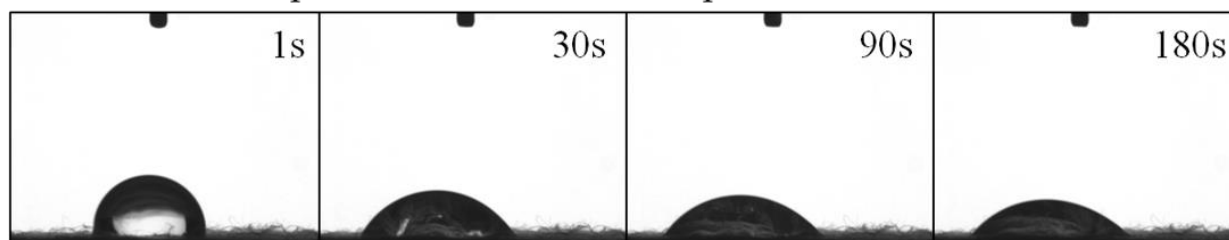

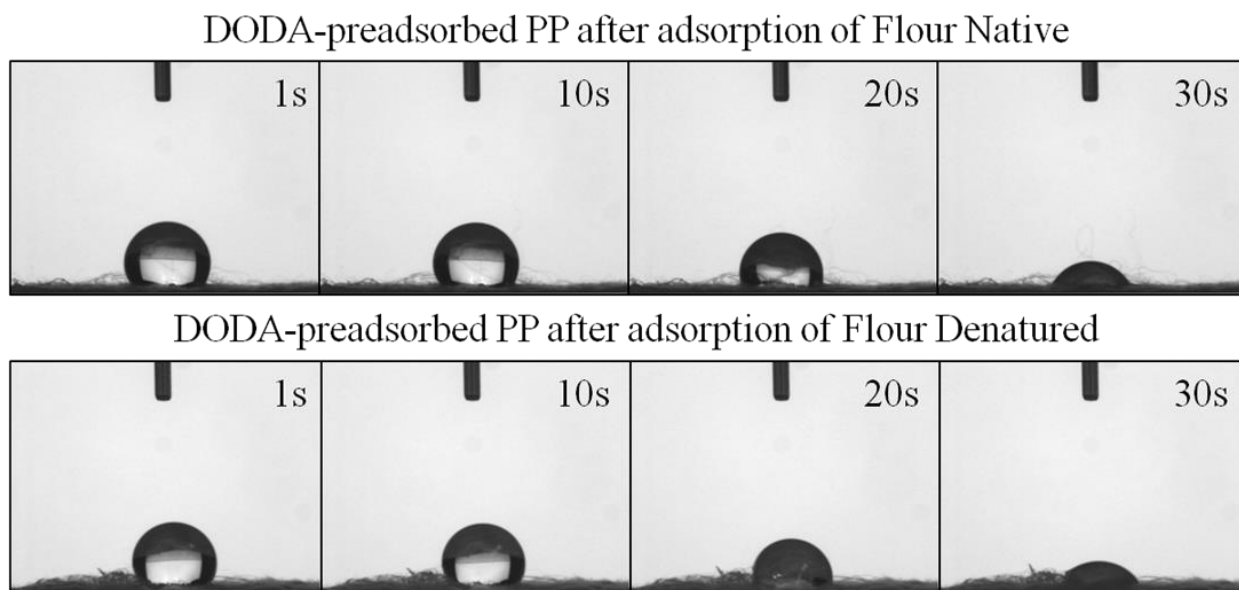

Figure SI-1. Contact angle images for the PP substrates after different treatments studied.

## References

1. Johannsmann, D.; Mathauer, K.; Wegner, G.; Knoll, W., *Phys. Rev. B: Condens. Matter* **1992**, 46, 7808-7815.
2. Naderi, A.; Claesson, P. M., *Langmuir* **2006**, 22, 7639-7645.
